# Supplementary material for: Mixed Reality in Undergraduate Mental Health Education: A Systematic Review
Source: MDPI journal article supplement (doi:10.3390/electronics12041019), 2023-02-18
Supplement: s1 [file s1]

Archive with 3 entries (3 files):
- Multimedia File S1_Electronics.pdf
- Multimedia File S2_Electronics.pdf
- Multimedia File S3_Electronics.pdf
