# Supplementary material for: Mixed Reality in Undergraduate Mental Health Education: A Systematic Review
Source: MDPI journal article supplement (doi:10.3390/electronics12041019), 2023-02-18
Supplement: s1 [file s1]

**Multimedia File S3.** Reasons for studies exclusion.

| Excluded                     | Reason for exclusion                                                                                                                    |
|------------------------------|-----------------------------------------------------------------------------------------------------------------------------------------|
| Abdullah et al. [36]         | No undergraduate students (30 twelve-year-old students).                                                                                |
| Aguinaga-Ontoso et al. [37]  | It is a Congress paper.                                                                                                                 |
| Allcoat et al. [38]          | No mental health undergraduate students (25 undergraduate students, training related to solar-power panel efficiency).                  |
| Antoniou et al. [39]         | No mental health undergraduate students (2 resident cardiologists, training related to emergency cases in cardiology).                  |
| Baños et al. [40]            | No undergraduate students.                                                                                                              |
| Bellamy et al. [41]          | Outcomes not provided about undergraduate students training using AR in health simulation.                                              |
| Bi et al. [42]               | No undergraduate students (Irish postgraduate business school students).                                                                |
| Birt et al. [43]             | No mental health education students (1st year physiology and anatomy students).                                                         |
| Chen et al. [44]             | No mental health education students (3rd year nursing students, training related to health assessment).                                 |
| Cochrane et al. [45]         | No mental health undergraduate students (paramedic students a 360° overview of a critical care scenario).                               |
| Cochrane et al. [46]         | No mental health undergraduate students (paramedic students).                                                                           |
| Collins & Ditzel. [47]       | No mental health education students (3rd year nursing students, training related to clinical reasoning skills).                         |
| Denholm et al. [48]          | No mental health undergraduate students (741 students of master's degree in project management).                                        |
| Frost et al. [49]            | No mental health education students (undergraduates nursing students, training related to enhance clinical judgement).                  |
| Habak et al. [50]            | No mental health undergraduate students (patients identified as reporting a mental health diagnosis)                                    |
| Kang et al. [51]             | No mental health undergraduate students (training related to earthquake topic).                                                         |
| Lertbumroongchai et al. [52] | No mental health undergraduate students (In-depth interview was conducted with 21 experts).                                             |
| Martinez-Cerda et al. [53]   | No mental health undergraduate students (computer-supported collaborative learning).                                                    |
| Rushton et al. [54]          | No mental health undergraduate students (36 nursing students trained related to basic life support-BLS- skills).                        |
| Sonntag & Bodensiek. [55]    | No mental health undergraduate students (45 science, technology, engineering, and mathematics students, trained in electrical circuit). |
| Stretton et al. [56]         | Systematic review not including mental health undergraduate students.                                                                   |
| Tang et al. [57]             | No mental health undergraduate students, trained related to learning design subjects).                                                  |
| Taylor & Soneji. [58]        | No results provided (narrative review). No mental health undergraduate students.                                                        |
| Usmani et al. [59]           | Narrative review addressing Metaverse for treatment of mental health disorders.                                                         |
