# Supplementary material for: Mixed Reality in Undergraduate Mental Health Education: A Systematic Review
Source: MDPI journal article supplement (doi:10.3390/electronics12041019), 2023-02-18
Supplement: s1 [file s1]

**Multimedia File S2.** Quality assessment of included studies.

| Type of study   | Study                 | Screening questions                     |                                                                    | Qualitative studies                                                           |                                                                                             |                                                         |                                                                           |                                                                                                    |
|-----------------|-----------------------|-----------------------------------------|--------------------------------------------------------------------|-------------------------------------------------------------------------------|---------------------------------------------------------------------------------------------|---------------------------------------------------------|---------------------------------------------------------------------------|----------------------------------------------------------------------------------------------------|
|                 |                       | S1. Are there clear research questions? | S2. Do the collected data allow to address the research questions? | 1.1. Is the qualitative approach appropriate to answer the research question? | 1.2. Are the qualitative data collection methods adequate to address the research question? | 1.3. Are the findings adequately derived from the data? | 1.4. Is the interpretation of results sufficiently substantiated by data? | 1.5. Is there coherence between qualitative data sources, collection, analysis and interpretation? |
| 1. Quantitative | Chuah et al. [60]     | Yes                                     | Yes                                                                |                                                                               |                                                                                             |                                                         |                                                                           |                                                                                                    |
| 2. Quantitative | Essmiller et al. [61] | Yes                                     | Yes                                                                |                                                                               |                                                                                             |                                                         |                                                                           |                                                                                                    |
| 3. Qualitative  | Frost et al [62]      | Yes                                     | Yes                                                                | Yes                                                                           | Yes                                                                                         | Yes                                                     | Yes                                                                       | Yes                                                                                                |
| 4. Qualitative  | Murphy. [63]          | Yes                                     | Yes                                                                | Yes                                                                           | Yes                                                                                         | Yes                                                     | Can't tell                                                                | Can't tell                                                                                         |
| 5. Quantitative | Na et al. [64]        | Yes                                     | Yes                                                                |                                                                               |                                                                                             |                                                         |                                                                           |                                                                                                    |
| 6. Mixed method | Perryman et al. [65]  | Yes                                     | Yes                                                                |                                                                               |                                                                                             |                                                         |                                                                           |                                                                                                    |

| Type of study   | Study                 | Quantitative descriptive studies                                         |                                                             |                                        |                                           |                                                                               | Mixed methods studies                                                                                  |                                                                                                        |                                                                                                            |                                                                                                             |                                                                                                                         |
|-----------------|-----------------------|--------------------------------------------------------------------------|-------------------------------------------------------------|----------------------------------------|-------------------------------------------|-------------------------------------------------------------------------------|--------------------------------------------------------------------------------------------------------|--------------------------------------------------------------------------------------------------------|------------------------------------------------------------------------------------------------------------|-------------------------------------------------------------------------------------------------------------|-------------------------------------------------------------------------------------------------------------------------|
|                 |                       | 4.1. Is the sampling strategy relevant to address the research question? | 4.2. Is the sample representative of the target population? | 4.3. Are the measurements appropriate? | 4.4. Is the risk of nonresponse bias low? | 4.5. Is the statistical analysis appropriate to answer the research question? | 5.1. Is there an adequate rationale for using a mixed methods design to address the research question? | 5.2. Are the different components of the study effectively integrated to answer the research question? | 5.3. Are the outputs of the integration of qualitative and quantitative components adequately interpreted? | 5.4. Are divergences and inconsistencies between quantitative and qualitative results adequately addressed? | 5.5. Do the different components of the study adhere to the quality criteria of each tradition of the methods involved? |
| 1. Quantitative | Chuah et al. [60]     | Yes                                                                      | Yes                                                         | Yes                                    | Yes                                       | Yes                                                                           |                                                                                                        |                                                                                                        |                                                                                                            |                                                                                                             |                                                                                                                         |
| 2. Quantitative | Essmiller et al. [61] | Yes                                                                      | Yes                                                         | Yes                                    | Yes                                       | Yes                                                                           |                                                                                                        |                                                                                                        |                                                                                                            |                                                                                                             |                                                                                                                         |
| 5. Quantitative | Na et al. [64]        | Yes                                                                      | Yes                                                         | Yes                                    | Yes                                       | Yes                                                                           |                                                                                                        |                                                                                                        |                                                                                                            |                                                                                                             |                                                                                                                         |
| 6. Mixed method | Perryman et al. [65]  |                                                                          |                                                             |                                        |                                           |                                                                               | Yes                                                                                                    | Yes                                                                                                    | Yes                                                                                                        | Yes                                                                                                         | Yes                                                                                                                     |
